# Supplementary material for: Designing a Self-Management App for Young People With Type 1 Diabetes: Methodological Challenges, Experiences, and Recommendations
Source: PubMed Central journal article supplement (PMC5673883; doi:10.2196/mhealth.8137), 2017-10-23
Supplement: mhealth_v5i10e124_app1.pdf [file mhealth_v5i10e124_app1.pdf]

Multimedia Appendix 1. Workshop overview

| Workshop                                    | Participants                                                                                                                   | Needs and possibilities approached                                                                                                                                                                                                                                                                                                                                                                                                                                                                                                                                                                                                                                                                                                                                                                                                                                                                                                                                                                                                                                                                                                                                                    | Main ideas identified                                                                                                                                                                                                                                                                                                                                                                                                                                                                                                                                                                                                                                                                                                                                                                                                                                                                                                                                                                                                                                                                                                                                                             | Functionality and modes of interaction - based on workshop ideas                                                                                                                                                                                                                                                                                                                                                                                                                                                                                                                                                                                                                                                                                                                               |
|---------------------------------------------|--------------------------------------------------------------------------------------------------------------------------------|---------------------------------------------------------------------------------------------------------------------------------------------------------------------------------------------------------------------------------------------------------------------------------------------------------------------------------------------------------------------------------------------------------------------------------------------------------------------------------------------------------------------------------------------------------------------------------------------------------------------------------------------------------------------------------------------------------------------------------------------------------------------------------------------------------------------------------------------------------------------------------------------------------------------------------------------------------------------------------------------------------------------------------------------------------------------------------------------------------------------------------------------------------------------------------------|-----------------------------------------------------------------------------------------------------------------------------------------------------------------------------------------------------------------------------------------------------------------------------------------------------------------------------------------------------------------------------------------------------------------------------------------------------------------------------------------------------------------------------------------------------------------------------------------------------------------------------------------------------------------------------------------------------------------------------------------------------------------------------------------------------------------------------------------------------------------------------------------------------------------------------------------------------------------------------------------------------------------------------------------------------------------------------------------------------------------------------------------------------------------------------------|------------------------------------------------------------------------------------------------------------------------------------------------------------------------------------------------------------------------------------------------------------------------------------------------------------------------------------------------------------------------------------------------------------------------------------------------------------------------------------------------------------------------------------------------------------------------------------------------------------------------------------------------------------------------------------------------------------------------------------------------------------------------------------------------|
| <b>Workshop 1:<br/>My Diabetes</b>          | <b>Young people (7),<br/>Parents (2),<br/>Health care providers (2),<br/>Persons with special expertise and knowledge (3)</b>  | <b>Retrospective study</b> <ul style="list-style-type: none"> <li>A general need to improve glycemic control</li> <li>Support those not attending clinic visits</li> </ul> <b>Interviews with young people and parents</b> <ul style="list-style-type: none"> <li>Support young people and parents to share concerns and challenges.</li> <li>Talk about and identify concerns, challenges and strategies in regard to hypoglycemia, worries about future, feeling different and incompetent in T1DM management.</li> </ul> <b>Interviews with health care providers</b> <ul style="list-style-type: none"> <li>Messages from young people should be sent to health care providers' work mail.</li> <li>The app could be a potential icebreaker to elucidate challenges and concerns.</li> <li>A need for ongoing support</li> </ul>                                                                                                                                                                                                                                                                                                                                                  | <b>Ice-breaker</b> <ul style="list-style-type: none"> <li><u>What</u> do you want to tell us? <ul style="list-style-type: none"> <li>HEADS</li> <li>This is me... (look at the "whole" person)</li> <li>Support from surroundings? What support do you need?</li> <li>How openly do you speak about your T1DM?</li> <li>How much do you want your friends to know about diabetes?</li> <li>What is most important for you right now?</li> <li>Where do you see yourself and your diabetes in 5 years?</li> <li>The biggest challenge about T1DM?</li> <li>Positive/negative experiences</li> <li>What do you want us to know?</li> </ul> </li> <li><u>How</u> do you want to tell us? (Pictures, Unfinished sentences, Diary, Agenda for the consultation)</li> </ul> <b>Other ideas</b> <ul style="list-style-type: none"> <li>My measures, pump, insulin, goals, next consultation, ordering equipment, favorite web pages</li> </ul>                                                                                                                                                                                                                                           | <b>Main-function</b> <ul style="list-style-type: none"> <li>"My Page"</li> </ul> <b>Functions, modes and interactions:</b> <p>Contact your provider/notebook</p> <ul style="list-style-type: none"> <li>Unfinished sentences/questions</li> <li>Add photos</li> <li>Next consultation</li> <li>Diary (post a photo/text)</li> <li>My measures, pump, insulin, goals, favorite web pages</li> </ul>                                                                                                                                                                                                                                                                                                                                                                                             |
| <b>Workshop 2:<br/>The app's functions</b>  | <b>Young people (4),<br/>Parents (3),<br/>Health care providers (2),<br/>Persons with special expertise and knowledge (2)</b>  | <b>Retrospective study</b> <ul style="list-style-type: none"> <li>A general need to improve glycemic control</li> <li>Support those not attending clinical visits</li> </ul> <b>Interviews with young people and parents</b> <ul style="list-style-type: none"> <li>Support young people and parents to share concerns and challenges.</li> <li>Support parents to help them support their young people.</li> <li>Talk about and identify concerns, challenges and strategies in regard to hypoglycemia, worries about future, feeling different and incompetent in T1DM-management.</li> </ul> <b>Interviews with health care providers</b> <ul style="list-style-type: none"> <li>The moderator role cannot be provided by health care providers</li> <li>Messages from young people should be sent to health care providers' work mail.</li> <li>The app could be a potential icebreaker to elucidate challenges and concerns.</li> <li>A need for ongoing support</li> </ul> <b>Identified and met the security regulations</b> <ul style="list-style-type: none"> <li>Contact function fulfills security regulations</li> <li>Chat room fulfills security regulations</li> </ul> | <b>Reminder function</b> <ul style="list-style-type: none"> <li>Set a reminder (predefined, define your own)</li> <li>How to get a reminder (repeat, notification, share with parents)</li> <li>Sync with calendar</li> </ul> <b>Contact-function</b> <ul style="list-style-type: none"> <li>Contact info: provider's picture, name, phone number, hours available</li> <li>Share blood glucose measures/cancel/book appointments/set the agenda</li> <li>Info about answering time</li> <li>Message notification</li> </ul> <b>Chat room</b> <ul style="list-style-type: none"> <li>Profile (picture, gender, age, department, be anonymous)</li> <li>Predefined groups (party/alcohol, food, sport)</li> <li>Open/private rooms</li> <li>Find someone with similar interest</li> <li>Share good and bad experiences/share knowledge/ask peers/upload tips/help to accept T1DM/ post an invitation</li> <li>For young people only</li> </ul> <b>Mentor</b> <ul style="list-style-type: none"> <li>Find/write a mentor</li> <li>Apply to be mentor</li> <li>Private room, mentor/mentee</li> <li>To help accept diabetes/To gain knowledge</li> <li>Mentor supervision</li> </ul> | <b>Main function</b> <ul style="list-style-type: none"> <li>Reminder</li> <li>Chat room</li> <li>"My Page"</li> </ul> <b>Functions, modes and interactions:</b> <p>Reminder</p> <ul style="list-style-type: none"> <li>Predefined/define your own reminders</li> <li>Set reminder interval</li> <li>Notification</li> </ul> <p>Chat with peers</p> <ul style="list-style-type: none"> <li>Create a profile</li> <li>Predefined groups</li> <li>Create a message/ post a comment or invitation</li> <li>Open chat rooms</li> <li>Receive a message notification</li> </ul> <p>Mentor</p> <ul style="list-style-type: none"> <li>Create a mentor profile</li> <li>Contact mentor</li> <li>Reply to be mentor/to get a mentor</li> <li>Mentor supervision</li> </ul> <p>Contact your provider</p> |
| <b>Workshop 3:<br/>The sensitive topics</b> | <b>Young people (3),<br/>Parents (2),<br/>Health care providers (3),<br/>Persons with special expertise and knowledge (17)</b> | <b>Retrospective study</b> <ul style="list-style-type: none"> <li>A general need to improve glycemic control</li> </ul> <b>Interviews with young people and parents</b> <ul style="list-style-type: none"> <li>Support young people and parents to share concerns and challenges.</li> <li>Support parents to help them support their young people.</li> </ul>                                                                                                                                                                                                                                                                                                                                                                                                                                                                                                                                                                                                                                                                                                                                                                                                                        | <b>Methods to identify the real challenge ("icebreaker")</b> <ul style="list-style-type: none"> <li>Contact your health care provider (share diary/share unfinished sentences/post a picture/set the agenda)</li> <li>Video self-portraits</li> </ul> <b>Information about "the soft themes..."</b> <ul style="list-style-type: none"> <li>Information about... (text, tips, video self-portraits, links)</li> </ul> <b>Others' experiences (sharing knowledge and experiences)</b>                                                                                                                                                                                                                                                                                                                                                                                                                                                                                                                                                                                                                                                                                               | <b>Main functions</b> <ul style="list-style-type: none"> <li>"My Page"</li> <li>Chat room</li> <li>Information-section</li> <li>Tips-packages</li> <li>To parents</li> </ul> <b>Functions, modes and interactions:</b>                                                                                                                                                                                                                                                                                                                                                                                                                                                                                                                                                                         |

|                                  |                                                                                                                   |                                                                                                                                                                                                                                                                                                                                                                                                                                                                                                                                                                                                                                                                                                                                                                               |                                                                                                                                                                                                                                                                                                                                                                                                                                                                                                                                                                                                                                                                                                                                                                                                                                                                                                                                                                                                                                                                                                                                                                                                                                                                |                                                                                                                                                                                                                                                                                                                                                                                                                                                                                                                                                                                                                                                                                                                                                                                                                                                                                                                                                                                                                                                                                                                                                                                                                               |
|----------------------------------|-------------------------------------------------------------------------------------------------------------------|-------------------------------------------------------------------------------------------------------------------------------------------------------------------------------------------------------------------------------------------------------------------------------------------------------------------------------------------------------------------------------------------------------------------------------------------------------------------------------------------------------------------------------------------------------------------------------------------------------------------------------------------------------------------------------------------------------------------------------------------------------------------------------|----------------------------------------------------------------------------------------------------------------------------------------------------------------------------------------------------------------------------------------------------------------------------------------------------------------------------------------------------------------------------------------------------------------------------------------------------------------------------------------------------------------------------------------------------------------------------------------------------------------------------------------------------------------------------------------------------------------------------------------------------------------------------------------------------------------------------------------------------------------------------------------------------------------------------------------------------------------------------------------------------------------------------------------------------------------------------------------------------------------------------------------------------------------------------------------------------------------------------------------------------------------|-------------------------------------------------------------------------------------------------------------------------------------------------------------------------------------------------------------------------------------------------------------------------------------------------------------------------------------------------------------------------------------------------------------------------------------------------------------------------------------------------------------------------------------------------------------------------------------------------------------------------------------------------------------------------------------------------------------------------------------------------------------------------------------------------------------------------------------------------------------------------------------------------------------------------------------------------------------------------------------------------------------------------------------------------------------------------------------------------------------------------------------------------------------------------------------------------------------------------------|
|                                  |                                                                                                                   | <ul style="list-style-type: none"> <li>• Talk about and identify concerns, challenges and strategies in regard to hypoglycemia, worries about future, feeling different and incompetent in T1DM management.</li> </ul> <p><b>Interviews with health care providers</b></p> <ul style="list-style-type: none"> <li>• The app could be a potential ice-breaker to elucidate the challenges and concerns.</li> <li>• A need for ongoing support</li> </ul>                                                                                                                                                                                                                                                                                                                       | <ul style="list-style-type: none"> <li>○ Peer stories</li> <li>○ Events</li> <li>○ Mentor</li> <li>○ Interactive diary/blog (with gate-keeper)</li> </ul>                                                                                                                                                                                                                                                                                                                                                                                                                                                                                                                                                                                                                                                                                                                                                                                                                                                                                                                                                                                                                                                                                                      | <p>Contact your provider/notebook</p> <ul style="list-style-type: none"> <li>○ Diary/Unfinished sentences/Post a picture</li> </ul> <p>Chat with peers</p> <ul style="list-style-type: none"> <li>○ Pre-defined groups (feeling different, best/worst thing about diabetes, fuck diabetes)</li> </ul> <p>Information (Text, links, tips, video self-portraits, animations)</p> <ul style="list-style-type: none"> <li>○ my body/diabetes stress/feeling different/hypo</li> </ul> <p>Tips-notifications</p> <ul style="list-style-type: none"> <li>○ Receive a tip-notification about (my body, diabetes stress, feeling different, hypo)</li> </ul> <p>To parents (text, links, tips, video self-portraits)</p> <ul style="list-style-type: none"> <li>○ what challenges can young with diabetes face/how to support</li> </ul>                                                                                                                                                                                                                                                                                                                                                                                              |
| <b>Workshop 4: Future</b>        | <b>Young people (5), Parents (3), Health care providers (3), Persons with special expertise and knowledge (1)</b> | <p><b>Retrospective study</b></p> <ul style="list-style-type: none"> <li>• A general need to improve glycemic control</li> </ul> <p><b>Interviews with young people and parents</b></p> <ul style="list-style-type: none"> <li>• Support young people and parents to share concerns and challenges.</li> <li>• Support parents to help them support their young people.</li> <li>• Talk about and identify worries about future.</li> </ul> <p><b>Interviews with health care providers</b></p> <ul style="list-style-type: none"> <li>• The app could be a potential icebreaker to elucidate the challenges and concerns.</li> </ul>                                                                                                                                         | <p><b>Information about...</b></p> <ul style="list-style-type: none"> <li>○ Pregnancy/T1DM complications/travel/education/family, alcohol/research update</li> <li>○ Support parents to get an overview, how can it be to be a parent.</li> </ul> <p>Sharing experiences</p> <ul style="list-style-type: none"> <li>○ Mentor</li> <li>○ Chat</li> <li>○ Positive stories</li> <li>○ Video self-portraits</li> <li>○ Contact your provider</li> </ul> <p>Youth consultations</p> <ul style="list-style-type: none"> <li>○ Give space to difficult thoughts</li> <li>○ Talk about potential challenges (worries about future)</li> <li>○ What is actually challenging</li> <li>○ Treatment should fit our lives, not the opposite</li> <li>○ Praise and be positive</li> <li>○ Motivate, ask</li> <li>○ App and patient at the same level/address problems earlier</li> <li>○ Personal consultations – what do you want to talk about</li> </ul> <p><b>My adult department</b></p> <ul style="list-style-type: none"> <li>○ Movie (how was it to move to adult department, what can adult department offer/who are we)</li> <li>○ Transfer information</li> <li>○ My new provider team (to be able to contact new provider, work experience, picture)</li> </ul> | <p><b>Main functions</b></p> <ul style="list-style-type: none"> <li>○ “My Page”</li> <li>○ “My department”</li> <li>○ Chat room</li> <li>○ Information section</li> <li>○ Tip packages</li> <li>○ To parents</li> </ul> <p><b>Functions, modes and interactions:</b></p> <p>Contact your provider/notebook</p> <ul style="list-style-type: none"> <li>○ Diary/unfinished sentences/post a picture/set the agenda</li> </ul> <p>My department (text/movies/photos of providers)</p> <ul style="list-style-type: none"> <li>○ Information (welcome, transfer to adult care, contact)</li> </ul> <p>Chat with peers</p> <ul style="list-style-type: none"> <li>○ Predefined groups (future, pregnancy, travel)</li> </ul> <p>Information (text, links, tips, video self-portraits, animations)</p> <ul style="list-style-type: none"> <li>○ Late complications/pregnancy/travel/sport/ what to tell others (e.g., at work)</li> </ul> <p>Tips notifications</p> <ul style="list-style-type: none"> <li>○ Late term complications/pregnancy/travel/sport</li> </ul> <p>To parents (text, links, tips, video self-portraits)</p> <ul style="list-style-type: none"> <li>○ Challenges the app can address/how to support</li> </ul> |
| <b>Workshop 5: To my parents</b> | <b>Young people (3), Parents (3), Health care providers (2), Persons with special expertise and knowledge (5)</b> | <p><b>Retrospective study</b></p> <ul style="list-style-type: none"> <li>• A general need to improve glycemic control</li> <li>• Families with divorced parents need extra support</li> </ul> <p><b>Interviews with young people and parents</b></p> <ul style="list-style-type: none"> <li>• Support young people and parents to share concerns and challenges.</li> <li>• Support parents to help them support their young people.</li> <li>• Talk about and identify the parties’ concerns, challenges and strategies in regard to hypoglycemia, worries about future, feeling different and incompetent in T1DM management.</li> </ul> <p><b>Interviews with health care providers</b></p> <ul style="list-style-type: none"> <li>• A need for ongoing support</li> </ul> | <p><b>A main function “To parents” (facts and information/chat, link to Facebook/tools (conflicts, anxiety)/video self-portraits)</b></p> <p>Information about being young with diabetes</p> <ul style="list-style-type: none"> <li>○ Brain development/What can be challenging (feeling different, “creating space” to measure blood glucose before everyone else runs out to school break)/normal reaction/information about alcohol, turning 18, diabetes etc. – provided with the basic knowledge to support.</li> </ul> <p>Information about being a parent to a young person with diabetes</p> <ul style="list-style-type: none"> <li>○ Acknowledge the challenge. It is normal to be afraid/frustrated/You know your teen the best. Keep support/partner relationship – can be a challenge</li> </ul> <p>Information about how young people wants to be supported</p> <ul style="list-style-type: none"> <li>○ Ask what kind of support we need/be available when we need you/talk about how we are doing (not only measurements)/show interest/help us during the difficult</li> </ul>                                                                                                                                                                 | <p><b>Main functions</b></p> <ul style="list-style-type: none"> <li>○ “My department”</li> <li>○ Information section</li> <li>○ Tips packages</li> <li>○ To parents</li> <li>○ Reminder</li> </ul> <p><b>Functions, modes and interactions:</b></p> <p>My department (What happens when my teen turns 18 and moves to adult department?)</p> <ul style="list-style-type: none"> <li>○ Information (welcome, transfer, contact, can parents join consultations?)</li> <li>○ Movies</li> <li>○ Pictures of providers</li> </ul> <p>Information section (Text, links, tips, video self-portraits, animations)</p> <ul style="list-style-type: none"> <li>○ Information about T1DM and ...</li> </ul>                                                                                                                                                                                                                                                                                                                                                                                                                                                                                                                             |

|                                                |                                                                                                                          |                                                                                                                                                                                                                                                                                                                                                                                                                                                                                                                                                                                                                                                 |                                                                                                                                                                                                                                                                                                                                                                                                                                                                                                                                                                                                                                                                                                                                                                                                                                                                                                                                                                                                                                                                                                                                                                                                                                                                                                                                                                                                                                                                                                                                                                                                                                                                                                                                                                                                                                                                                                                                                                                                                                                                                                                                                                                                                                                                                                                                                                                   |                                                                                                                                                                                                                                                                                                                                                                                                                                                                                                                                                                                                                                                                                                                                                                                                                                                                                                          |
|------------------------------------------------|--------------------------------------------------------------------------------------------------------------------------|-------------------------------------------------------------------------------------------------------------------------------------------------------------------------------------------------------------------------------------------------------------------------------------------------------------------------------------------------------------------------------------------------------------------------------------------------------------------------------------------------------------------------------------------------------------------------------------------------------------------------------------------------|-----------------------------------------------------------------------------------------------------------------------------------------------------------------------------------------------------------------------------------------------------------------------------------------------------------------------------------------------------------------------------------------------------------------------------------------------------------------------------------------------------------------------------------------------------------------------------------------------------------------------------------------------------------------------------------------------------------------------------------------------------------------------------------------------------------------------------------------------------------------------------------------------------------------------------------------------------------------------------------------------------------------------------------------------------------------------------------------------------------------------------------------------------------------------------------------------------------------------------------------------------------------------------------------------------------------------------------------------------------------------------------------------------------------------------------------------------------------------------------------------------------------------------------------------------------------------------------------------------------------------------------------------------------------------------------------------------------------------------------------------------------------------------------------------------------------------------------------------------------------------------------------------------------------------------------------------------------------------------------------------------------------------------------------------------------------------------------------------------------------------------------------------------------------------------------------------------------------------------------------------------------------------------------------------------------------------------------------------------------------------------------|----------------------------------------------------------------------------------------------------------------------------------------------------------------------------------------------------------------------------------------------------------------------------------------------------------------------------------------------------------------------------------------------------------------------------------------------------------------------------------------------------------------------------------------------------------------------------------------------------------------------------------------------------------------------------------------------------------------------------------------------------------------------------------------------------------------------------------------------------------------------------------------------------------|
|                                                |                                                                                                                          |                                                                                                                                                                                                                                                                                                                                                                                                                                                                                                                                                                                                                                                 | <p>days/listen to our frustrations/and stand by our side when we are not able to meet the expectations/do not hide/avoid diabetes – we then feel alone/don't be too controlling. We do not want to be interviewed by our parents. It makes us feel even more different/focus on realistic goals/support healthy lifestyle, education etc./do not seem like you know more about diabetes than us/do not interrupt when someone asks about our diabetes</p> <ul style="list-style-type: none"> <li>○ Parent tools (conflict management/dialogue tools/how to let go)</li> </ul> <p>Peer experiences</p> <ul style="list-style-type: none"> <li>○ Parent to parent chat/meetings/link to face book</li> <li>○ Young people present/tell their experiences (video self-portraits)</li> </ul>                                                                                                                                                                                                                                                                                                                                                                                                                                                                                                                                                                                                                                                                                                                                                                                                                                                                                                                                                                                                                                                                                                                                                                                                                                                                                                                                                                                                                                                                                                                                                                                          | <p>Tips notifications</p> <ul style="list-style-type: none"> <li>○ Tips about T1DM and...</li> <li>○ About being young with diabetes</li> <li>○ How to support your teen</li> </ul> <p>To parents (text, links, tips, video self-portraits)</p> <ul style="list-style-type: none"> <li>○ Challenges faced by young with T1DM</li> <li>○ How to support</li> <li>○ What happens when my teen turns 18?</li> <li>○ Siblings and relationship</li> </ul> <p>Reminder</p>                                                                                                                                                                                                                                                                                                                                                                                                                                    |
| <p><b>Workshop 6: Knowledge and skills</b></p> | <p><b>Young people (6), Parents (4), Health care providers (6), Persons with special expertise and knowledge (2)</b></p> | <p><b>Retrospective study</b></p> <ul style="list-style-type: none"> <li>• A general need to improve glycemic control</li> <li>• Families with divorced parents need extra support</li> </ul> <p><b>Interviews with young people and parents</b></p> <ul style="list-style-type: none"> <li>• Support parents to help them support their young people.</li> <li>• Talk about and identify concerns, challenges and strategies in regard to hypoglycemia and being incompetent in T1DM management.</li> </ul> <p><b>Interviews with health care providers</b></p> <ul style="list-style-type: none"> <li>• A need for ongoing support</li> </ul> | <p><b>How to receive information?</b></p> <ul style="list-style-type: none"> <li>○ Text/animation/alcohol list/video self-portraits/links/tips</li> <li>○ Seek information - box</li> </ul> <p><b>Information about...</b></p> <ul style="list-style-type: none"> <li>○ Turning 18: What support can I get from community before/after turning 18/My social rights/What should I do when I turn 18?</li> <li>○ Drugs: Don't/how it influences blood glucose level/diabetes/consequences/where to get help/why drugs are dangerous?</li> <li>○ Drivers' license: What does it take to get a drivers' license (blood glucose level, insulin shock, complications)/renewal of drivers' license/tips – before driving/getting low during driving etc.</li> <li>○ Sex: How sex influences your blood glucose/how to prevent being low/"lines" – how to tell your partner about diabetes/prevention/pump – keep it on/or not/something not possible</li> <li>○ Sport: How does sport influence my body/help my diabetes/protein supplement and diabetes/food before and after exercise/insulin dosing tips/tips before, during, after exercise /when to measure blood glucose (before, during, after)/how to keep a stable blood glucose level during sport/how do different types of sport influence my blood glucose</li> <li>○ Alcohol: how alcohol influences my body/blood glucose/list of carbs in alcohol/pump settings and alcohol/info to friends (drunk vs. having hypoglycemia)/what is best to drink</li> <li>○ Travel: SOS, what do I do when losing insulin/break down of pump/how to store insulin/different time zones/what to remember – list/different food influences on blood glucose/from pump to pen/pump passport/how does heat/cold influence blood glucose/change in physical activity)</li> <li>○ Hypoglycemia: What to eat?/how should I prepare friends?/glucagon/prevent hypoglycemia when exercising/symptoms/definition/what happens?/hotline)</li> <li>○ Ketoacidosis: what is it/symptoms/why does it happen?/can I measure it?/what should I do?)</li> <li>○ Pump/pen: Accessories/note insulin dosing/how to convert pump to pen/how and where to inject/SOS: acute pump failure/how to calculate insulin sensitivity/insulin nodes/type of insulin/ump pros/cons)</li> <li>○ Food: List of carbohydrates in food/link to other apps/fast</li> </ul> | <p><b>Main functions</b></p> <ul style="list-style-type: none"> <li>○ "My page"</li> <li>○ Carbohydrate counting</li> <li>○ Chat room</li> <li>○ Information section</li> <li>○ Tips packages</li> </ul> <p><b>Functions, modes and interactions:</b></p> <p>"My page"</p> <ul style="list-style-type: none"> <li>○ Ask a question of your health care provider</li> <li>○ Set the agenda</li> <li>○ Note "My insulin"</li> <li>○ Calculate and note "Insulin sensitivity"</li> </ul> <p>Carbohydrate counting</p> <ul style="list-style-type: none"> <li>○ Information/tips/how to count/quiz/description and links to other carbohydrate-counting apps</li> </ul> <p>Chat room</p> <ul style="list-style-type: none"> <li>○ Ask peers (predefined groups of different diabetes sections)</li> </ul> <p>Information (Text, links, tips, video self-portraits, animations)</p> <p>Tips notifications</p> |

|                                                        |                                                                                                                           |                                                                                                                                                                                                                                                                                                                                                                                                                                                                                                                                                                                                                           |                                                                                                                                                                                                                                                                                                                                                                                                                                                                                                                                                                                                                                                                                                                                                                                                                                                                                                                                                                                                                                                                                                                                       |                                                                                                                                                                                                                                                                                                                                                                                                                                                                                                                                                                                                                                                                                                                                                                                                                                                                                                                                                                   |
|--------------------------------------------------------|---------------------------------------------------------------------------------------------------------------------------|---------------------------------------------------------------------------------------------------------------------------------------------------------------------------------------------------------------------------------------------------------------------------------------------------------------------------------------------------------------------------------------------------------------------------------------------------------------------------------------------------------------------------------------------------------------------------------------------------------------------------|---------------------------------------------------------------------------------------------------------------------------------------------------------------------------------------------------------------------------------------------------------------------------------------------------------------------------------------------------------------------------------------------------------------------------------------------------------------------------------------------------------------------------------------------------------------------------------------------------------------------------------------------------------------------------------------------------------------------------------------------------------------------------------------------------------------------------------------------------------------------------------------------------------------------------------------------------------------------------------------------------------------------------------------------------------------------------------------------------------------------------------------|-------------------------------------------------------------------------------------------------------------------------------------------------------------------------------------------------------------------------------------------------------------------------------------------------------------------------------------------------------------------------------------------------------------------------------------------------------------------------------------------------------------------------------------------------------------------------------------------------------------------------------------------------------------------------------------------------------------------------------------------------------------------------------------------------------------------------------------------------------------------------------------------------------------------------------------------------------------------|
|                                                        |                                                                                                                           |                                                                                                                                                                                                                                                                                                                                                                                                                                                                                                                                                                                                                           | <p>and slow carbs/insulin dosing/food to keep blood glucose level stable/what does a dietician offer?/food and sport/protein supplement/how to avoid gaining weight/simple recipes/when does my blood glucose rise after different food intake/how to count carbohydrates</p> <p><b>Carbohydrate counting, main function</b></p> <ul style="list-style-type: none"> <li>○ Introduction to carbohydrate counting apps/food and sport/insulin dosing/social (chat/ask your dietician/blog)/party (alcohol lexicon, eat before sleep)/tips/fast and slow carbs/hypoglycemia – what can I eat?</li> </ul>                                                                                                                                                                                                                                                                                                                                                                                                                                                                                                                                 |                                                                                                                                                                                                                                                                                                                                                                                                                                                                                                                                                                                                                                                                                                                                                                                                                                                                                                                                                                   |
| <p><b>Workshop 7: Design, Language and Message</b></p> | <p><b>Young people (5), Parents (1), Health care providers (0), Persons with special expertise and knowledge (15)</b></p> | <p><b>Interviews with young people and parents</b></p> <ul style="list-style-type: none"> <li>• Support young people and parents to share concerns and challenges.</li> <li>• Support parents to help them support their young people.</li> <li>• Talk about and identify concerns, challenges and strategies in regard to hypoglycemia, worries about future, feeling different and incompetent in T1DM management.</li> </ul> <p><b>Interviews with health care providers</b></p> <ul style="list-style-type: none"> <li>• The app could be a potential icebreaker to elucidate the challenges and concerns.</li> </ul> | <p><b>Layout</b></p> <ul style="list-style-type: none"> <li>○ Simple/like customizing/blue and green colors with icons/should not remind about diabetes/funny/Main functions should be distinct/sub-menus at the side of the screen/icons instead of text/no color-box pictures</li> <li>○ Article layout (heading, short summary, detailed description – all articles should be designed the same way, tips/good ideas)</li> </ul> <p><b>Navigation</b></p> <ul style="list-style-type: none"> <li>○ Easy to navigate/main categories with submenus</li> </ul> <p><b>Content</b></p> <ul style="list-style-type: none"> <li>○ No log book – too much work</li> <li>○ Place “Seek information” function at the top of the screen</li> <li>○ Tips/articles/chat</li> </ul> <p><b>Language</b></p> <ul style="list-style-type: none"> <li>○ Neutral language - not threatening. (e.g., be careful about writing “this is dangerous...” – instead “take precautions”)</li> </ul> <p><b>Message</b></p> <ul style="list-style-type: none"> <li>○ Focus on possibilities/positive things instead of limitations/negative things</li> </ul> | <p><b>Layout</b></p> <ul style="list-style-type: none"> <li>○ Blue and green colors/icons with illustrations/main functions distinct/submenus at the side of the screen</li> <li>○ Article layout (heading, short summary, detailed description, including tips, possible to choose to see video)</li> </ul> <p><b>Navigation</b></p> <ul style="list-style-type: none"> <li>○ Easy to navigate/main categories with submenus</li> </ul> <p><b>Content</b></p> <ul style="list-style-type: none"> <li>○ “My page” (including the unfinished sentence “The best about diabetes...”)/articles/chat (including the pre-defined group: “the best about diabetes”)/</li> <li>○ “Seek information” function in the top of information section</li> </ul> <p><b>Language</b></p> <ul style="list-style-type: none"> <li>○ Neutral – not threatening</li> </ul> <p><b>Message</b></p> <ul style="list-style-type: none"> <li>○ Positive/focus on possibilities</li> </ul> |
